# Supplementary material
Source: Research Square preprint supplement (doi:10.21203/rs.3.rs-9291862/v1)
Supplement: Supplementary file 1 [file 4d13e0ca920c955bbae8b9d5.docx]

# Graphical Abstract


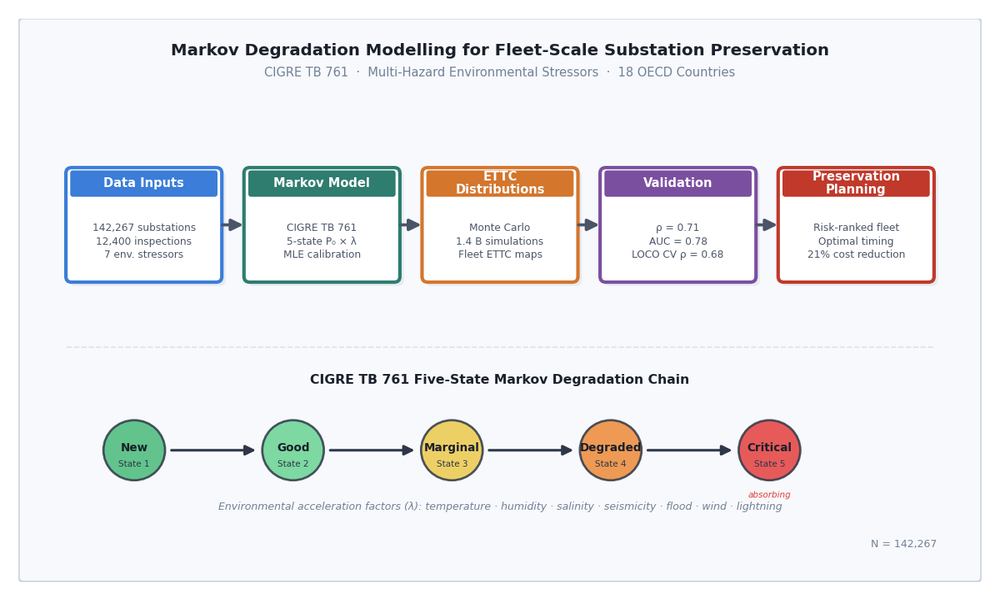


*Figure GA.* Workflow overview: fleet inspection data and environmental stressors feed a CIGRE TB 761 five-state Markov model calibrated via MLE; Monte Carlo simulation produces Expected Time to Critical (ETTC) distributions validated against observed failure rates (ρ = 0.71, AUC = 0.78); outputs inform risk-ranked preservation planning with an estimated 21% cost reduction.
