# Supplementary material
Source: Research Square preprint supplement (doi:10.21203/rs.3.rs-9291862/v1)
Supplement: Supplementary file 2 [file aa4dab89585df9d07b47b64a.docx]

**Supplementary Materials**

*Markov Degradation Modelling for Fleet-Scale Substation Preservation: Integrating CIGRE TB 761 with Multi-Hazard Environmental Stressors Across Eighteen OECD Countries*

*Cedric Bérard*†, Gianluca Raucci†, Prof. Dr. Ignacio Menendez Pidal PTU (Escuela de Caminos, UPM), Jesús Pérez Blázquez†, Isabel Prat†*

*† Ikenga, Employee-Owned Company, Madrid, Spain & Naples, Italy*

** Corresponding author: ssi_index@ikenga.eu | ORCID: 0000-0002-XXXX-XXXX*

**Table A1.** Bootstrap 95% confidence intervals for baseline transition matrix P₀. Point estimates with 95% CIs in brackets, obtained from 1,000-replicate parametric bootstrap on the 12,400 European transformer condition assessments (2010–2020). Zero entries are structural (Assumption 1: monotone degradation) and have no uncertainty. Critical (state 5) is absorbing with probability 1.00 by definition.

| **From \ To** | **New** | **Good** | **Marginal** | **Degraded** | **Critical** |
| --- | --- | --- | --- | --- | --- |
| New (1) | 0.95 [0.93, 0.97] | 0.05 [0.03, 0.07] | 0 | 0 | 0 |
| Good (2) | 0 | 0.85 [0.82, 0.88] | 0.12 [0.09, 0.15] | 0.03 [0.01, 0.05] | 0 |
| Marginal (3) | 0 | 0 | 0.75 [0.71, 0.79] | 0.20 [0.16, 0.24] | 0.05 [0.03, 0.08] |
| Degraded (4) | 0 | 0 | 0 | 0.70 [0.65, 0.75] | 0.30 [0.25, 0.35] |
| Critical (5) | 0 | 0 | 0 | 0 | 1.00 |

The bootstrap procedure resampled the 12,400 inspection records with replacement (stratified by operator and decade of inspection), re-estimated the transition matrix via maximum likelihood for each replicate, and extracted the 2.5th and 97.5th percentiles across the 1,000 replicates. The widest confidence interval is for the Degraded→Critical transition (0.30 [0.25, 0.35]), reflecting the smaller number of observed transitions into the absorbing state. The narrowest is for the New→New diagonal (0.95 [0.93, 0.97]), reflecting the large number of young assets in the dataset.

Sensitivity of fleet-median ETTC to perturbations in P₀ is reported in the main text (Section 5.3, elasticity E = 0.28). A ±20% perturbation of all off-diagonal entries produces a ±5.6% change in fleet-median ETTC, indicating moderate sensitivity that is smaller than the effect of environmental acceleration factors (E = 0.21–0.34).
